# Supplementary material for: Improving Processing and Performance of Pure Lignin Carbon Fibers through Hardwood and Herbaceous Lignin Blends
Source: Int J Mol Sci. 2017 Jul 1;18(7):1410. doi: 10.3390/ijms18071410 (PMC5535902; doi:10.3390/ijms18071410)
Supplement: Supplementary file 1 [file ijms-18-01410-s001.pdf]

# Supplementary Materials: Improving Processing and Performance of Pure Lignin Carbon Fibers through Hardwood and Herbaceous Lignin Blends

Omid Hosseinaei, David P. Harper, Joseph J. Bozell and Timothy G. Rials

**Table S1.** Tukey test results for mechanical properties of carbon fibers made from different ratios of switchgrass (SG) and yellow poplar (YP) lignin blend (*w/w*).<sup>a,b</sup>

| Source        | Stabilization rate (°C min <sup>-1</sup> ) | Tensile strength (MPa) | Tensile modulus (GPa) |
|---------------|--------------------------------------------|------------------------|-----------------------|
| 50% YP:50% SG | 0.05                                       | BC                     | A                     |
| 50% YP:50% SG | 0.1                                        | BCD                    | A                     |
| 50% YP:50% SG | 0.2                                        | BCD                    | A                     |
| 50% YP:50% SG | 0.5                                        | CD                     | AB                    |
| 75% YP:25% SG | 0.05                                       | B                      | A                     |
| 75% YP:25% SG | 0.1                                        | CD                     | CD                    |
| 75% YP:25% SG | 0.2                                        | CD                     | CD                    |
| 75% YP:25% SG | 0.5                                        | EF                     | D                     |
| 85% YP:15% SG | 0.05                                       | A                      | A                     |
| 85% YP:15% SG | 0.1                                        | BC                     | A                     |
| 85% YP:15% SG | 0.2                                        | DE                     | BC                    |
| 85% YP:15% SG | 0.5                                        | F                      | D                     |

<sup>a</sup> Interaction of two factors (blend ratio and stabilization rate).

<sup>b</sup> Samples not connected by same letters are significantly different ( $p < 0.01$ ).
